# Supplementary material for: COVID-19: viral–host interactome analyzed by network based-approach model to study pathogenesis of SARS-CoV-2 infection
Source: J Transl Med. 2020 Jun 10;18:233. doi: 10.1186/s12967-020-02405-w (PMC7286221; doi:10.1186/s12967-020-02405-w)
Supplement: Supplementary file 1 — Additional file 1: Table S1. List of accession numbers of H-CoV. Table S2. List of genes selected by RWR algorithm for HCoV-229E, along with proximity score. Table S3. List of genes selected by RWR algorithm for SARS-CoV, along with proximity score. Table S4. List of genes selected by RWR algorithm for MERS-CoV, along with proximity score. [file 12967_2020_2405_MOESM1_ESM.xlsx]

## Sheet: Table S1
Table S1: List of accession numbers of H-CoV.
1	Accession Number	Host	Organism	Group	Lineage
2	NC002645	Human	Human coronavirus 229E	229E	Coronaviridae; Orthocoronavirinae; Alphacoronavirus; Duvinacovirus,
3	AF304460	Human	Human coronavirus 229E	229E	Coronaviridae; Orthocoronavirinae; Alphacoronavirus; Duvinacovirus,
4	KY073747	Bat	229E-related bat coronavirus	229E-related	Coronaviridae; Coronavirinae; Alphacoronavirus,
5	KY073748	Bat	229E-related bat coronavirus	229E-related	Coronaviridae; Coronavirinae; Alphacoronavirus,
6	KX344031	Human	Human coronavirus OC43	Human coronavirus	Coronaviridae; Coronavirinae; Betacoronavirus,
7	MK167038	Human	Human coronavirus HKU1	Human coronavirus	Cornidovirineae; Coronaviridae; Coronavirinae;
8	MG428704	Human	Human coronavirus NL63	Human coronavirus	Coronaviridae; Coronavirinae; Alphacoronavirus,
9	MN306053	Human	Human coronavirus OC43	Human coronavirus	Coronaviridae; Orthocoronavirinae; Betacoronavirus; Embecovirus,
10	DQ415901	Human	Human coronavirus HKU1	Human coronavirus	Coronaviridae; Coronavirinae; Betacoronavirus,
11	EPI_ISL_410545	isolate (Human)	Human coronavirus IT_INMI_2020	Human coronavirus	Coronaviridae; Coronavirinae; Betacoronavirus,
12	EPI_ISL_410546	Human	Human coronavirus IT_INMI_2020	Human coronavirus	Coronaviridae; Coronavirinae; Betacoronavirus,
13	EPI_ISL_412964	Human	Human coronavirus Brazil_ex_IT_2020	Human coronavirus	Coronaviridae; Coronavirinae; Betacoronavirus,
14	EPI_ISL_412972	Human	Human coronavirus Mexico_ex_IT_2020	Human coronavirus	Coronaviridae; Coronavirinae; Betacoronavirus,
15	KU710265	Human	Middle East respiratory syndrome-related coronavirus	Human MERS	Coronaviridae; Coronavirinae; Betacoronavirus,
16	MK129253	Human	Middle East respiratory syndrome-related coronavirus	Human MERS	Cornidovirineae; Coronaviridae; Orthocoronavirinae;
17	MG021451	Bat	Middle East respiratory syndrome-related coronavirus	Bat MERS	Coronaviridae; Coronavirinae; Betacoronavirus,
18	MG021452	Bat	Middle East respiratory syndrome-related coronavirus	Bat MERS	Coronaviridae; Coronavirinae; Betacoronavirus,
19	MG596802	Bat	Middle East respiratory syndrome-related coronavirus	Bat MERS	Coronaviridae; Coronavirinae; Betacoronavirus,
20	DQ022305	Bat	Bat SARS coronavirus HKU3-1	Bat SARS coronavirus	Coronaviridae; Orthocoronavirinae; Betacoronavirus; Sarbecovirus,
21	GQ153542	Bat	Bat SARS coronavirus HKU3-7	Bat SARS coronavirus	Coronaviridae; Orthocoronavirinae; Betacoronavirus; Sarbecovirus,
22	DQ412043	Bat	Bat SARS coronavirus Rm1/2004	Bat SARS coronavirus	Coronaviridae; Orthocoronavirinae; Betacoronavirus; Sarbecovirus,
23	DQ071615	Bat	Bat SARS coronavirus Rp3/2004	Bat SARS coronavirus	Coronaviridae; Orthocoronavirinae; Betacoronavirus; Sarbecovirus,
24	FJ588686	Bat	SARS coronavirus Rs_672/2006	Bat SARS coronavirus	Coronaviridae; Orthocoronavirinae; Betacoronavirus; Sarbecovirus,
25	KY417143	Bat	Bat SARS-like coronavirus	Bat SARS-like coronavirus	Coronaviridae; Coronavirinae; Betacoronavirus,
26	KY417145	Bat	Bat SARS-like coronavirus	Bat SARS-like coronavirus	Coronaviridae; Coronavirinae; Betacoronavirus,
27	KY417148	Bat	Bat SARS-like coronavirus	Bat SARS-like coronavirus	Coronaviridae; Coronavirinae; Betacoronavirus,
28	KY417150	Bat	Bat SARS-like coronavirus	Bat SARS-like coronavirus	Coronaviridae; Coronavirinae; Betacoronavirus,
29	KY417152	Bat	Bat SARS-like coronavirus	Bat SARS-like coronavirus	Coronaviridae; Coronavirinae; Betacoronavirus,
30	MG772933	Bat	Bat SARS-like coronavirus	Bat SARS-like coronavirus	Coronaviridae; Orthocoronavirinae; Betacoronavirus; Sarbecovirus,
31	MG772934	Bat	Bat SARS-like coronavirus	Bat SARS-like coronavirus	Coronaviridae; Orthocoronavirinae; Betacoronavirus; Sarbecovirus,
32	KC881006	Bat	Bat SARS-like coronavirus Rs3367	Bat SARS-like coronavirus	Coronaviridae; Orthocoronavirinae; Betacoronavirus; Sarbecovirus,
33	KC881005	Bat	Bat SARS-like coronavirus RsSHC014	Bat SARS-like coronavirus	Coronaviridae; Orthocoronavirinae; Betacoronavirus; Sarbecovirus,
34	KP886808	Bat	Bat SARS-like coronavirus YNLF_31C	Bat SARS-like coronavirus	Coronaviridae; Orthocoronavirinae; Betacoronavirus; Sarbecovirus,
35	KT444582	Bat	SARS-like coronavirus WIV16	Bat SARS-like coronavirus	Coronaviridae; Coronavirinae; Betacoronavirus;
36	KY352407	Bat	Severe acute respiratory syndrome-related coronavirus	Bat SARS-like coronavirus	Coronaviridae; Orthocoronavirinae; Betacoronavirus; Sarbecovirus,
37	JF292915	Mus musculus	SARS coronavirus MA15	SARS coronavirus	Coronaviridae; Orthocoronavirinae; Betacoronavirus; Sarbecovirus,
38	FJ882960	Isolate Vero 6	SARS coronavirus ExoN1	SARS coronavirus	Coronaviridae; Orthocoronavirinae; Betacoronavirus; Sarbecovirus,
39	AY463060	Isolate	SARS coronavirus ShanghaiQXC2	SARS coronavirus	Coronaviridae; Orthocoronavirinae; Betacoronavirus; Sarbecovirus,
40	MK062180	Human	SARS coronavirus Urbani	SARS coronavirus	Coronaviridae; Coronavirinae; Betacoronavirus,
41	AY278741	Isolate Vero 6 human	SARS coronavirus Urbani	SARS coronavirus	Coronaviridae; Orthocoronavirinae; Betacoronavirus; Sarbecovirus,
42	FJ882949	Isolate Vero 6	SARS coronavirus wtic-MB	SARS coronavirus	Coronaviridae; Orthocoronavirinae; Betacoronavirus; Sarbecovirus,
43	MN908947	Human	Severe acute respiratory syndrome coronavirus 2	SARS coronavirus	Coronaviridae; Orthocoronavirinae; Betacoronavirus; Sarbecovirus,
44	JX163928	Isolate ferrets	Severe acute respiratory syndrome-related coronavirus	SARS-related coronavirus	Coronaviridae; Orthocoronavirinae; Betacoronavirus; Sarbecovirus,
45	DQ898174	Isolate	Severe acute respiratory syndrome-related coronavirus	SARS-related coronavirus	Coronaviridae; Orthocoronavirinae; Betacoronavirus; Sarbecovirus,
46	DQ497008	Mus musculus	Severe acute respiratory syndrome-related coronavirus	SARS-related coronavirus	Coronaviridae; Orthocoronavirinae; Betacoronavirus; Sarbecovirus,
47	MH938448	Bat (Pipistrellus kuhlii)	Alphacoronavirus Pipistrellus kuhlii	Bat Alphacoronavirus	Coronaviridae; Coronavirinae; Alphacoronavirus;
48	MH938450	Bat (Pipistrellus kuhlii)	Alphacoronavirus Pipistrellus kuhlii	Bat Alphacoronavirus	Coronaviridae; Coronavirinae; Alphacoronavirus;
49	MK472067	Bat (microbat)	Alphacoronavirus sp.	Bat Alphacoronavirus	Coronaviridae; Orthocoronavirinae; Alphacoronavirus; unclassified
50	MK472068	Bat (microbat)	Alphacoronavirus sp.	Bat Alphacoronavirus	Coronaviridae; Orthocoronavirinae; Alphacoronavirus; unclassified
51	MK472070	Bat (microbat)	Alphacoronavirus sp.	Bat Alphacoronavirus	Coronaviridae; Orthocoronavirinae; Alphacoronavirus; unclassified
52	MK472071	Bat (microbat)	Alphacoronavirus sp.	Bat Alphacoronavirus	Coronaviridae; Orthocoronavirinae; Alphacoronavirus; unclassified
53	MH687951	Bat (Scotophilus kuhlii)	Alphacoronavirus sp.	Bat Alphacoronavirus	Coronaviridae; Coronavirinae; Alphacoronavirus;
54	MH687958	Bat (Scotophilus kuhlii)	Alphacoronavirus sp.	Bat Alphacoronavirus	Coronaviridae; Coronavirinae; Alphacoronavirus;
55	MH687960	Bat (Scotophilus kuhlii)	Alphacoronavirus sp.	Bat Alphacoronavirus	Coronaviridae; Coronavirinae; Alphacoronavirus;
56	MH687962	Bat (Scotophilus kuhlii)	Alphacoronavirus sp.	Bat Alphacoronavirus	Coronaviridae; Coronavirinae; Alphacoronavirus;
57	MH687966	Bat (Scotophilus kuhlii)	Alphacoronavirus sp.	Bat Alphacoronavirus	Coronaviridae; Coronavirinae; Alphacoronavirus;
58	MH687967	Bat (Scotophilus kuhlii)	Alphacoronavirus sp.	Bat Alphacoronavirus	Coronaviridae; Coronavirinae; Alphacoronavirus;
59	MN065811	Bat	Bat alphacoronavirus	Bat Alphacoronavirus	Coronaviridae; Orthocoronavirinae; Alphacoronavirus; unclassified
60	KJ473799	Bat	BtMf-AlphaCoV/FJ2012	Bat Alphacoronavirus	Coronaviridae; Coronavirinae; Alphacoronavirus,
61	KJ473797	Bat	BtMf-AlphaCoV/GD2012	Bat Alphacoronavirus	Coronaviridae; Coronavirinae; Alphacoronavirus,
62	KJ473806	Bat	BtMr-AlphaCoV/SAX2011	Bat Alphacoronavirus	Coronaviridae; Orthocoronavirinae; Alphacoronavirus; Myotacovirus; Myotis
63	KJ473809	Bat	BtNv-AlphaCoV/SC2013	Bat Alphacoronavirus	Coronaviridae; Orthocoronavirinae; Alphacoronavirus; Nyctacovirus; Nyctalus
64	KJ473807	Bat	BtRf-AlphaCoV/HuB2013	Bat Alphacoronavirus	Coronaviridae; Orthocoronavirinae; Alphacoronavirus; Decacovirus; Rhinolophus
65	KJ473808	Bat	BtRf-AlphaCoV/YN2012	Bat Alphacoronavirus	Coronaviridae; Orthocoronavirinae; Alphacoronavirus; unclassified
66	KJ473813	Bat	BtRf-BetaCoV/SX2013	Bat Alphacoronavirus	Coronaviridae; Coronavirinae; Betacoronavirus,
67	MK211373	Bat	Coronavirus BtRs-AlphaCoV/YN2018	Bat Alphacoronavirus	Coronaviridae; Orthocoronavirinae; Alphacoronavirus; unclassified
68	MK211369	Bat	Coronavirus BtSk-AlphaCoV/GX2018A	Bat Alphacoronavirus	Coronaviridae; Orthocoronavirinae; Alphacoronavirus; unclassified
69	KF636752	Bat	Bat Hp-betacoronavirus/Zhejiang2013	Bat betacoronavirus	Coronaviridae; Orthocoronavirinae; Betacoronavirus; Hibecovirus; Bat
70	KC545386	Hedgehog	Betacoronavirus Erinaceus/VMC/DEU/2012	Bat Betacoronavirus	Coronaviridae; Orthocoronavirinae; Betacoronavirus; Merbecovirus,
71	MH687968	Rattus	Betacoronavirus sp.	Bat Betacoronavirus	Coronaviridae; Coronavirinae; Betacoronavirus;
72	MH687969	Rattus	Betacoronavirus sp.	Bat Betacoronavirus	Coronaviridae; Coronavirinae; Betacoronavirus;
73	MH687970	Rattus	Betacoronavirus sp.	Bat Betacoronavirus	Coronaviridae; Coronavirinae; Betacoronavirus;
74	KJ473814	Bat	BtRs-BetaCoV/HuB2013	Bat Betacoronavirus	Coronaviridae; Coronavirinae; Betacoronavirus,
75	KJ473816	Bat	BtRs-BetaCoV/YN2013	Bat Betacoronavirus	Coronaviridae; Coronavirinae; Betacoronavirus,
76	KJ473821	Bat	BtVs-BetaCoV/SC2013	Bat Betacoronavirus	Coronaviridae; Coronavirinae; Betacoronavirus,
77	MK211374	Bat	Coronavirus BtRl-BetaCoV/SC2018	Bat Betacoronavirus	Coronaviridae; Orthocoronavirinae; Betacoronavirus; unclassified
78	MK211376	Bat	Coronavirus BtRs-BetaCoV/YN2018B	Bat Betacoronavirus	Coronaviridae; Orthocoronavirinae; Betacoronavirus; unclassified
79	MK211377	Bat	Coronavirus BtRs-BetaCoV/YN2018C	Bat Betacoronavirus	Coronaviridae; Orthocoronavirinae; Betacoronavirus; unclassified
80	MK211378	Bat	Coronavirus BtRs-BetaCoV/YN2018D	Bat Betacoronavirus	Coronaviridae; Orthocoronavirinae; Betacoronavirus; unclassified
81	MK211379	Bat	Coronavirus BtRt-BetaCoV/GX2018	Bat Betacoronavirus	Coronaviridae; Orthocoronavirinae; Betacoronavirus; unclassified
82	KU182965	Bat	Bat coronavirus	Bat coronavirus	Coronaviridae; Coronavirinae; unclassified
83	KX574227	Bat	Bat coronavirus	Bat coronavirus	Coronaviridae; Coronavirinae; unclassified Coronavirinae,
84	KY770851	Bat	Bat coronavirus	Bat coronavirus	Coronaviridae; Coronavirinae; unclassified Coronavirinae,
85	KY938558	Bat	Bat coronavirus	Bat coronavirus	Coronaviridae; Coronavirinae; unclassified
86	MG916903	Bat	Bat coronavirus	Bat coronavirus	Cornidovirineae; Coronaviridae; Coronavirinae;
87	MG916904	Bat	Bat coronavirus	Bat coronavirus	Cornidovirineae; Coronaviridae; Coronavirinae;
88	MK492263	Bat	Bat coronavirus	Bat coronavirus	Coronaviridae; Coronavirinae; unclassified coronaviruses,
89	DQ648794	Bat	Bat coronavirus (BtCoV/133/2005)	Bat coronavirus	Coronaviridae; Orthocoronavirinae; Betacoronavirus; Merbecovirus,
90	EU420137	Bat	Bat coronavirus 1B	Bat coronavirus	Coronaviridae; Coronavirinae; Alphacoronavirus;
91	GU190215	Bat	Bat coronavirus BM48-31/BGR/2008	Bat coronavirus	Coronaviridae; Coronavirinae; unclassified Coronavirinae,
92	JX993988	Bat	Bat coronavirus Cp/Yunnan2011	Bat coronavirus	Coronaviridae; Coronavirinae; Betacoronavirus,
93	EF065513	Bat	Bat coronavirus HKU9-1	Bat coronavirus	Coronaviridae; Orthocoronavirinae; Betacoronavirus; Nobecovirus,
94	HM211101	Bat	Bat coronavirus HKU9-10-2	Bat coronavirus	Coronaviridae; Orthocoronavirinae; Betacoronavirus; Nobecovirus,
95	EF065515	Bat	Bat coronavirus HKU9-3	Bat coronavirus	Coronaviridae; Orthocoronavirinae; Betacoronavirus; Nobecovirus,
96	EF065516	Bat	Bat coronavirus HKU9-4	Bat coronavirus	Coronaviridae; Orthocoronavirinae; Betacoronavirus; Nobecovirus,
97	JX993987	Bat	Bat coronavirus Rp/Shaanxi2011	Bat coronavirus	Coronaviridae; Coronavirinae; Betacoronavirus,
98	EPI_ISL_402131	Bat	BetaCoV/bat/Yunnan/RaTG13/2013	Bat coronavirus	Coronaviridae; Coronavirinae; Betacoronavirus,
99	KC869678	Bat	Coronavirus Neoromicia/PML-PHE1/RSA/2011	Bat coronavirus	Coronaviridae; Orthocoronavirinae; Betacoronavirus; Merbecovirus,
100	MN611523	Bat (Hipposideros)	Hipposideros pomona bat coronavirus	Bat coronavirus	Coronaviridae; Orthocoronavirinae; Alphacoronavirus; Decacovirus;
101	MN611525	Bat (Hipposideros)	Hipposideros pomona bat coronavirus CHB25	Bat coronavirus	Coronaviridae; Orthocoronavirinae; Alphacoronavirus; Decacovirus;
102	KX442564	Bat	Hypsugo bat coronavirus HKU25	Bat coronavirus	Coronaviridae; Coronavirinae; unclassified
103	KY799179	Bat	Myotis lucifugus coronavirus	Bat coronavirus	Coronaviridae; Coronavirinae; Alphacoronavirus,
104	MN611520	Bat	Pipistrellus abramus bat coronavirus	Bat coronavirus	Coronaviridae; Orthocoronavirinae; Betacoronavirus; Merbecovirus;
105	KF569996	Bat	Rhinolophus affinis coronavirus	Bat coronavirus	Coronaviridae; Orthocoronavirinae; Betacoronavirus; Sarbecovirus,
106	MN611522	Bat	Rhinolophus affinis bat coronavirus HKU2-related	Bat coronavirus	Coronaviridae; Orthocoronavirinae; Alphacoronavirus; Rhinacovirus;
107	MK720945	Bat	Rhinolophus bat coronavirus HKU32	Bat coronavirus	Coronaviridae; Orthocoronavirinae; Alphacoronavirus; unclassified
108	JQ989270	Bat	Rousettus bat coronavirus HKU10	Bat coronavirus	Coronaviridae; Orthocoronavirinae; Alphacoronavirus; Decacovirus,
109	KU762338	Bat	Rousettus bat coronavirus	Bat coronavirus	Coronaviridae; Orthocoronavirinae; Betacoronavirus; Nobecovirus; Rousettus
110	MG762674	Bat	Rousettus bat coronavirus HKU9	Bat coronavirus	Coronaviridae; Coronavirinae; Betacoronavirus,
111	MN611521	Bat	Scotophilus kuhlii bat coronavirus 512-related	Bat coronavirus	Coronaviridae; Orthocoronavirinae; Alphacoronavirus; Pedacovirus;
112	MK720944	Bat	Tylonycteris bat coronavirus HKU33	Bat coronavirus	Coronaviridae; Orthocoronavirinae; Alphacoronavirus; unclassified
113	EU111742	Whale	Beluga whale coronavirus SW1	Beluga coronavirus	Coronaviridae; Orthocoronavirinae; Gammacoronavirus; Cegacovirus,
114	JF274479	Chicken	Infectious bronchitis virus	Birds Infectious bronchitis	Coronaviridae; Orthocoronavirinae; Gammacoronavirus; Igacovirus,
115	JF330898	Chicken	Infectious bronchitis virus	Birds Infectious bronchitis	Coronaviridae; Orthocoronavirinae; Gammacoronavirus; Igacovirus,
116	JF893452	Chicken	Infectious bronchitis virus	Birds Infectious bronchitis	Coronaviridae; Coronavirinae; Gammacoronavirus,
117	JQ088078	Chicken	Infectious bronchitis virus	Birds Infectious bronchitis	Coronaviridae; Orthocoronavirinae; Gammacoronavirus; Igacovirus,
118	JX195178	Chicken	Infectious bronchitis virus	Birds Infectious bronchitis	Coronaviridae; Orthocoronavirinae; Gammacoronavirus; Igacovirus,
119	KC008600	Chicken	Infectious bronchitis virus	Birds Infectious bronchitis	Coronaviridae; Orthocoronavirinae; Gammacoronavirus; Igacovirus,
120	JQ977697	Gallus	Infectious bronchitis virus	Birds Infectious bronchitis	Coronaviridae; Orthocoronavirinae; Gammacoronavirus; Igacovirus,
121	KF460437	Gallus	Infectious bronchitis virus	Birds Infectious bronchitis	Coronaviridae; Orthocoronavirinae; Gammacoronavirus; Igacovirus,
122	KM213963	Gallus	Infectious bronchitis virus	Birds Infectious bronchitis	Coronaviridae; Orthocoronavirinae; Gammacoronavirus; Igacovirus,
123	KP118892	Gallus	Infectious bronchitis virus	Birds Infectious bronchitis	Coronaviridae; Orthocoronavirinae; Gammacoronavirus; Igacovirus,
124	KP118894	Gallus	Infectious bronchitis virus	Birds Infectious bronchitis	Coronaviridae; Orthocoronavirinae; Gammacoronavirus; Igacovirus,
125	KP662631	Gallus	Infectious bronchitis virus	Birds Infectious bronchitis	Coronaviridae; Coronavirinae; Gammacoronavirus,
126	AY319651	Gallus	Infectious bronchitis virus	Birds Infectious bronchitis	Coronaviridae; Orthocoronavirinae; Gammacoronavirus; Igacovirus,
127	DQ646405	Isolate	Infectious bronchitis virus	Birds Infectious bronchitis	Coronaviridae; Orthocoronavirinae; Gammacoronavirus; Igacovirus,
128	FJ904714	Chicken	Infectious bronchitis virus	Birds Infectious bronchitis	Coronaviridae; Orthocoronavirinae; Gammacoronavirus; Igacovirus,
129	FJ904715	Chicken	Infectious bronchitis virus	Birds Infectious bronchitis	Coronaviridae; Orthocoronavirinae; Gammacoronavirus; Igacovirus,
130	FJ904722	Chicken	Infectious bronchitis virus	Birds Infectious bronchitis	Coronaviridae; Orthocoronavirinae; Gammacoronavirus; Igacovirus,
131	GQ504722	Chicken	Infectious bronchitis virus	Birds Infectious bronchitis	Coronaviridae; Orthocoronavirinae; Gammacoronavirus; Igacovirus,
132	KY588134	Chicken	Infectious bronchitis virus	Birds Infectious bronchitis	Coronaviridae; Coronavirinae; Gammacoronavirus,
133	MG197727	Chicken	Infectious bronchitis virus	Birds Infectious bronchitis	Coronaviridae; Coronavirinae; Gammacoronavirus,
134	MG233398	Chicken	Infectious bronchitis virus	Birds Infectious bronchitis	Coronaviridae; Orthocoronavirinae; Gammacoronavirus; Igacovirus,
135	MK142676	Chicken	Infectious bronchitis virus	Birds Infectious bronchitis	Coronaviridae; Orthocoronavirinae; Gammacoronavirus; Igacovirus,
136	MN096598	Chicken	Infectious bronchitis virus	Birds Infectious bronchitis	Coronaviridae; Orthocoronavirinae; Gammacoronavirus; Igacovirus,
137	MN512434	Chicken	Infectious bronchitis virus	Birds Infectious bronchitis	Coronaviridae; Orthocoronavirinae; Gammacoronavirus; Igacovirus,
138	MN599049	Chicken	Infectious bronchitis virus	Birds Infectious bronchitis	Coronaviridae; Orthocoronavirinae; Gammacoronavirus; Igacovirus,
139	GU393332	Gallus	Infectious bronchitis virus	Birds Infectious bronchitis	Coronaviridae; Orthocoronavirinae; Gammacoronavirus; Igacovirus,
140	GU393333	Gallus	Infectious bronchitis virus	Birds Infectious bronchitis	Coronaviridae; Orthocoronavirinae; Gammacoronavirus; Igacovirus,
141	MF924725	Gallus	Infectious bronchitis virus	Birds Infectious bronchitis	Coronaviridae; Coronavirinae; Gammacoronavirus,
142	MK217372	Gallus	Infectious bronchitis virus	Birds Infectious bronchitis	Coronaviridae; Orthocoronavirinae; Gammacoronavirus; Igacovirus,
143	MK217373	Gallus	Infectious bronchitis virus	Birds Infectious bronchitis	Coronaviridae; Orthocoronavirinae; Gammacoronavirus; Igacovirus,
144	MK217375	Gallus	Infectious bronchitis virus	Birds Infectious bronchitis	Coronaviridae; Orthocoronavirinae; Gammacoronavirus; Igacovirus,
145	MK581201	Gallus	Infectious bronchitis virus	Birds Infectious bronchitis	Coronaviridae; Orthocoronavirinae; Gammacoronavirus; Igacovirus,
146	MK581202	Gallus	Infectious bronchitis virus	Birds Infectious bronchitis	Coronaviridae; Orthocoronavirinae; Gammacoronavirus; Igacovirus,
147	MK581205	Gallus	Infectious bronchitis virus	Birds Infectious bronchitis	Coronaviridae; Orthocoronavirinae; Gammacoronavirus; Igacovirus,
148	MK581207	Gallus	Infectious bronchitis virus	Birds Infectious bronchitis	Coronaviridae; Orthocoronavirinae; Gammacoronavirus; Igacovirus,
149	FJ888351	Gallus	Infectious bronchitis virus	Birds Infectious bronchitis	Coronaviridae; Orthocoronavirinae; Gammacoronavirus; Igacovirus,
150	GU393336	Gallus	Infectious bronchitis virus	Birds Infectious bronchitis	Coronaviridae; Orthocoronavirinae; Gammacoronavirus; Igacovirus,
151	HQ848267	Gallus	Infectious bronchitis virus	Birds Infectious bronchitis	Coronaviridae; Orthocoronavirinae; Gammacoronavirus; Igacovirus,
152	KP868572	Gallus	Infectious bronchitis virus	Birds Infectious bronchitis	Coronaviridae; Coronavirinae; Gammacoronavirus,
153	KR608272	Gallus	Infectious bronchitis virus	Birds Infectious bronchitis	Coronaviridae; Coronavirinae; Gammacoronavirus,
154	KT852992	Gallus	Infectious bronchitis virus	Birds Infectious bronchitis	Coronaviridae; Coronavirinae; Gammacoronavirus,
155	KX185057	Gallus	Infectious bronchitis virus	Birds Infectious bronchitis	Coronaviridae; Coronavirinae; Gammacoronavirus,
156	KX236001	Gallus	Infectious bronchitis virus	Birds Infectious bronchitis	Coronaviridae; Coronavirinae; Gammacoronavirus,
157	KX236005	Gallus	Infectious bronchitis virus	Birds Infectious bronchitis	Coronaviridae; Coronavirinae; Gammacoronavirus,
158	KX302866	Gallus	Infectious bronchitis virus	Birds Infectious bronchitis	Coronaviridae; Coronavirinae; Gammacoronavirus,
159	KX364296	Gallus	Infectious bronchitis virus	Birds Infectious bronchitis	Coronaviridae; Coronavirinae; Gammacoronavirus,
160	KX434790	Gallus	Infectious bronchitis virus	Birds Infectious bronchitis	Coronaviridae; Coronavirinae; Gammacoronavirus,
161	AF220295	Bovine	Bovine coronavirus	Bovine coronavirus	Coronaviridae; Orthocoronavirinae; Betacoronavirus; Embecovirus,
162	FJ376619	Bird (Pycnonotidae)	Bulbul coronavirus HKU11-934	Bulbul coronavirus	Coronaviridae; Orthocoronavirinae; Deltacoronavirus; Buldecovirus,
163	KT368894	Camel	Camel alphacoronavirus	Camel Alphacoronavirus	Coronaviridae; Orthocoronavirinae; Alphacoronavirus; Duvinacovirus,
164	MK359255	Goose	Canada goose coronavirus	Canada coronavirus	Coronaviridae; Orthocoronavirinae; Gammacoronavirus; unclassified
165	KP849472	Canine	Alphacoronavirus 1	Canine Alphacoronavirus	Coronaviridae; Coronavirinae; Alphacoronavirus,
166	JN856008	Canine	Canine coronavirus	Canine coronavirus	Coronaviridae; Orthocoronavirinae; Alphacoronavirus; Tegacovirus,
167	JQ404409	Canine	Canine coronavirus	Canine coronavirus	Coronaviridae; Orthocoronavirinae; Alphacoronavirus; Tegacovirus,
168	JQ404410	Canine	Canine coronavirus	Canine coronavirus	Coronaviridae; Orthocoronavirinae; Alphacoronavirus; Tegacovirus,
169	KP981644	Canine	Canine coronavirus	Canine coronavirus	Coronaviridae; Coronavirinae; Alphacoronavirus,
170	JQ065049	Rallidi	Common moorhen coronavirus HKU21	Common moorhen coronavirus	Coronaviridae; Orthocoronavirinae; Deltacoronavirus; Moordecovirus,
171	KF793826	Dolphins	Bottlenose dolphin coronavirus HKU22	Dolphins coronavirus	Coronaviridae; Orthocoronavirinae; Gammacoronavirus; Cegacovirus,
172	MN514965	Dromedary	Dromedary camel coronavirus HKU23	Dromedary coronavirus	Coronaviridae; Orthocoronavirinae; Betacoronavirus; Embecovirus,
173	KM454473	Duck	Duck coronavirus	Duck coronavirus	Coronaviridae; Coronavirinae; Gammacoronavirus,
174	EF446615	Equine	Equine coronavirus	Equine coronavirus	Coronaviridae; Orthocoronavirinae; Betacoronavirus; Embecovirus,
175	LC061273	Equine	Equine coronavirus	Equine coronavirus	Coronaviridae; Orthocoronavirinae; Betacoronavirus; Embecovirus,
176	LC364342	Falcon	Falcon coronavirus UAE-HKU27	Falcon coronavirus	Coronaviridae; Coronavirinae; unclassified
177	MH817484	Feline	Feline alphacoronavirus 1	Feline Alphacoronavirus	Coronaviridae; Coronavirinae; Alphacoronavirus;
178	JN634064	Feline	Feline coronavirus	Feline coronavirus	Coronaviridae; Orthocoronavirinae; Alphacoronavirus; Tegacovirus,
179	JQ408980	Feline	Feline coronavirus	Feline coronavirus	Coronaviridae; Orthocoronavirinae; Alphacoronavirus; Tegacovirus,
180	KP143507	Feline	Feline coronavirus	Feline coronavirus	Coronaviridae; Orthocoronavirinae; Alphacoronavirus; Tegacovirus,
181	DQ848678	Feline	Feline coronavirus	Feline coronavirus	Coronaviridae; Orthocoronavirinae; Alphacoronavirus; Tegacovirus,
182	EU186072	Feline	Feline coronavirus	Feline coronavirus	Coronaviridae; Orthocoronavirinae; Alphacoronavirus; Tegacovirus,
183	GQ152141	Feline	Feline coronavirus	Feline coronavirus	Coronaviridae; Orthocoronavirinae; Alphacoronavirus; Tegacovirus,
184	KU215419	Feline	Feline coronavirus	Feline coronavirus	Coronaviridae; Coronavirinae; Alphacoronavirus,
185	KU215427	Feline	Feline coronavirus	Feline coronavirus	Coronaviridae; Coronavirinae; Alphacoronavirus,
186	KX722530	Feline	Feline coronavirus	Feline coronavirus	Coronaviridae; Coronavirinae; Alphacoronavirus,
187	KY292377	Feline	Feline coronavirus	Feline coronavirus	Coronaviridae; Coronavirinae; Alphacoronavirus,
188	KY566209	Feline	Feline coronavirus	Feline coronavirus	Coronaviridae; Coronavirinae; Alphacoronavirus,
189	MN165107	Feline	Feline coronavirus	Feline coronavirus	Coronaviridae; Orthocoronavirinae; Alphacoronavirus; Tegacovirus,
190	FJ938058	Feline	Feline coronavirus UU16	Feline coronavirus	Coronaviridae; Orthocoronavirinae; Alphacoronavirus; Tegacovirus,
191	HQ012369	Feline	Feline coronavirus UU21	Feline coronavirus	Coronaviridae; Orthocoronavirinae; Alphacoronavirus; Tegacovirus,
192	HQ012370	Feline	Feline coronavirus UU24	Feline coronavirus	Coronaviridae; Orthocoronavirinae; Alphacoronavirus; Tegacovirus,
193	FJ938061	Feline	Feline coronavirus UU3	Feline coronavirus	Coronaviridae; Orthocoronavirinae; Alphacoronavirus; Tegacovirus,
194	FJ938054	Feline	Feline coronavirus UU4	Feline coronavirus	Coronaviridae; Orthocoronavirinae; Alphacoronavirus; Tegacovirus,
195	KM347965	Ferret	Ferret coronavirus	Ferret coronavirus	Coronaviridae; Orthocoronavirinae; Alphacoronavirus; Minacovirus,
196	LC119077	Ferret	Ferret coronavirus	Ferret coronavirus	Coronaviridae; Orthocoronavirinae; Alphacoronavirus; Minacovirus,
197	EF424623	Giraffe	Giraffe coronavirus US/OH3/2003	Giraffe coronavirus	Coronaviridae; Orthocoronavirinae; Betacoronavirus; Embecovirus,
198	LN610099	Guinea fowl	Guinea fowl coronavirus GfCoV/FR/2011	Guinea fowl coronavirus	Coronaviridae; Orthocoronavirinae; Gammacoronavirus; Igacovirus,
199	MK907286	Hedgehog	Erinaceus hedgehog coronavirus HKU31	Hedgehog coronavirus	Coronaviridae; Orthocoronavirinae; Betacoronavirus; Merbecovirus;
200	KC667074	Human	Human betacoronavirus 2c England-Qatar/2012	Human Betacorona	Coronaviridae; Orthocoronavirinae; Betacoronavirus; Merbecovirus,
201	EU418975	Isolate	Infectious bronchitis virus	Isolate Infectious bronchitis	Coronaviridae; Orthocoronavirinae; Gammacoronavirus; Igacovirus,
202	EU637854	Isolate	Infectious bronchitis virus	Isolate Infectious bronchitis	Coronaviridae; Orthocoronavirinae; Gammacoronavirus; Igacovirus,
203	FN430415	Isolate	Infectious bronchitis virus NGA/A116E7/2006	Isolate Infectious bronchitis	Coronaviridae; Orthocoronavirinae; Gammacoronavirus; Igacovirus,
204	JQ065046	Bird Magpie-robin	Magpie-robin coronavirus HKU18	Magpie-robin	Coronaviridae; Orthocoronavirinae; Deltacoronavirus; unclassified
205	EU420138	Bat	Miniopterus bat coronavirus 1	Miniopterus bat	Coronaviridae; Orthocoronavirinae; Alphacoronavirus; Minunacovirus,
206	EU420139	Bat	Miniopterus bat coronavirus HKU8	Miniopterus bat	Coronaviridae; Orthocoronavirinae; Alphacoronavirus; Minunacovirus,
207	MF113046	Mink	Alphacoronavirus Mink/China/1/2016	Mink Alphacoronavirus	Coronaviridae; Coronavirinae; Alphacoronavirus;
208	HM245925	Mink	Mink coronavirus strain WD1127	Mink coronavirus	Coronaviridae; Orthocoronavirinae; Alphacoronavirus; Minacovirus,
209	FJ376622	Bird munia	Munia coronavirus HKU13-3514	Munia coronavirus	Coronaviridae; Orthocoronavirinae; Deltacoronavirus; Buldecovirus,
210	JX169866	Murine	Murine coronavirus	Murine coronavirus	Coronaviridae; Coronavirinae; Betacoronavirus,
211	JX169867	Murine	Murine coronavirus	Murine coronavirus	Coronaviridae; Coronavirinae; Betacoronavirus,
212	KP887098	Murine	Murine coronavirus	Murine coronavirus	Coronaviridae; Coronavirinae; Betacoronavirus,
213	FJ647223	Murine	Murine coronavirus MHV-1	Murine coronavirus	Coronaviridae; Orthocoronavirinae; Betacoronavirus; Embecovirus,
214	FJ647224	Murine	Murine coronavirus MHV-3	Murine coronavirus	Coronaviridae; Orthocoronavirinae; Betacoronavirus; Embecovirus,
215	JQ173883	Murine	Murine hepatitis virus strain S/3239-17	Murine hepatitis	Coronaviridae; Orthocoronavirinae; Betacoronavirus; Embecovirus,
216	AC000192	Murine	Murine hepatitis virus	Murine hepatitis	Coronaviridae; Orthocoronavirinae; Betacoronavirus; Embecovirus,
217	AF208066	Murine	Murine hepatitis virus	Murine hepatitis	Coronaviridae; Orthocoronavirinae; Betacoronavirus; Embecovirus,
218	AF208067	Murine	Murine hepatitis virus	Murine hepatitis	Coronaviridae; Orthocoronavirinae; Betacoronavirus; Embecovirus,
219	MF618252	Murine	Murine hepatitis virus	Murine hepatitis	Coronaviridae; Coronavirinae; Betacoronavirus,
220	MF618253	Murine	Murine hepatitis virus	Murine hepatitis	Coronaviridae; Coronavirinae; Betacoronavirus,
221	AY204704	Murine	RNA transcription vector pBRDI1	Murine hepatitis	Coronaviridae; Coronavirinae; Alphacoronavirus,
222	AY204705	Murine	RNA transcription vector pBRDI2	Murine hepatitis	Coronaviridae; Coronavirinae; Alphacoronavirus,
223	JQ065047	Bird Night heron	Night heron coronavirus HKU19	Night heron coronavirus	Coronaviridae; Orthocoronavirinae; Deltacoronavirus; Herdecovirus,
225	MK423876	Pheasant	Pheasant coronavirus	Pheasant coronavirus	Coronaviridae; Orthocoronavirinae; Gammacoronavirus; Igacovirus,
226	MH708124	Porcine	Porcine deltacoronavirus	Porcine deltacoronavirus	Coronaviridae; Coronavirinae,
227	KX534205	Porcine	Porcine epidemic diarrhea virus	Porcine diarrhea virus	Coronaviridae; Coronavirinae; Alphacoronavirus,
228	KX839248	Porcine	Porcine epidemic diarrhea virus	Porcine diarrhea virus	Coronaviridae; Coronavirinae; Alphacoronavirus,
229	KX981440	Porcine	Porcine epidemic diarrhea virus	Porcine diarrhea virus	Coronaviridae; Coronavirinae; Alphacoronavirus,
230	KY420075	Porcine	Porcine epidemic diarrhea virus	Porcine diarrhea virus	Coronaviridae; Coronavirinae; Alphacoronavirus,
231	KY963963	Porcine	Porcine epidemic diarrhea virus	Porcine diarrhea virus	Coronaviridae; Orthocoronavirinae; Alphacoronavirus; Pedacovirus,
232	MG334555	Porcine	Porcine epidemic diarrhea virus	Porcine diarrhea virus	Coronaviridae; Coronavirinae; Alphacoronavirus,
233	DQ011855	Porcine	Porcine hemagglutinating encephalomyelitis virus	Porcine hemagglutinating encephalomyelitis virus	Coronaviridae; Orthocoronavirinae; Betacoronavirus; Embecovirus,
234	KY419109	Porcine	Porcine hemagglutinating encephalomyelitis virus	Porcine hemagglutinating encephalomyelitis virus	Coronaviridae; Coronavirinae; Betacoronavirus,
235	KY419112	Porcine	Porcine hemagglutinating encephalomyelitis virus	Porcine hemagglutinating encephalomyelitis virus	Coronaviridae; Coronavirinae; Betacoronavirus,
236	KY994645	Porcine	Porcine hemagglutinating encephalomyelitis virus	Porcine hemagglutinating encephalomyelitis virus	Coronaviridae; Coronavirinae; Betacoronavirus,
237	KY406735	Porcine	Porcine respiratory coronavirus	Porcine respiratory coronavirus	Coronaviridae; Coronavirinae; Alphacoronavirus,
238	LC364345	Quail	Quail coronavirus UAE-HKU30	Quail coronavirus	Coronaviridae; Coronavirinae; unclassified
239	MH532440	Quail	Quail deltacoronavirus	Quail deltacoronavirus	Cornidovirineae; Coronaviridae; Orthocoronavirinae;
240	JN874560	Rabbit	Rabbit coronavirus HKU14	Rabbit coronavirus	Coronaviridae; Coronavirinae; Betacoronavirus;
241	JN874562	Rabbit	Rabbit coronavirus HKU14	Rabbit coronavirus	Coronaviridae; Coronavirinae; Betacoronavirus;
242	KF294380	Rattus	Lucheng Rn rat coronavirus	Rat coronavirus	Coronaviridae; Orthocoronavirinae; Alphacoronavirus; Luchacovirus,
243	JF792616	Rattus	Rat coronavirus	Rat coronavirus	Coronaviridae; Orthocoronavirinae; Betacoronavirus; Embecovirus,
244	KY073744	Bat	NL63-related bat coronavirus	related bat coronavirus	Coronaviridae; Orthocoronavirinae; Alphacoronavirus; Setracovirus;
245	KY073745	Bat	NL63-related bat coronavirus	related bat coronavirus	Coronaviridae; Orthocoronavirinae; Alphacoronavirus; Setracovirus;
246	KY073746	Bat	NL63-related bat coronavirus	related bat coronavirus	Coronaviridae; Coronavirinae; Alphacoronavirus;
247	KX964649	Rodents	Coronavirus AcCoV-JC34	Rodents coronavirus	Coronaviridae; Orthocoronavirinae; Alphacoronavirus; unclassified
248	JQ065045	Sparrow	Sparrow coronavirus HKU17	Sparrow coronavirus	Coronaviridae; Orthocoronavirinae; Deltacoronavirus; unclassified
249	MG812376	Sparrow	Sparrow deltacoronavirus	Sparrow coronavirus	Coronaviridae; Coronavirinae; unclassified
250	MH615810	Swine	Swine acute diarrhea syndrome coronavirus	Swine diarrea	Coronaviridae; Coronavirinae; unclassified
251	MF094685	Swine	Swine acute diarrhea syndrome related	Swine diarrea	Coronaviridae; Coronavirinae; unclassified
252	KR061459	Swine	Swine enteric coronavirus	Swine enteric coronavirus	Coronaviridae; Orthocoronavirinae; Alphacoronavirus; Tegacovirus,
253	FJ376621	Thrush	Thrush coronavirus HKU12-600	Thrush coronavirus	Coronaviridae; Orthocoronavirinae; Deltacoronavirus,
254	KX499468	Porcine	Transmissible gastroenteritis virus	Transmissible gastrenteric gastroenteritis	Coronaviridae; Coronavirinae; Alphacoronavirus,
255	KR822424	Turkey	European turkey coronavirus 080385d	Turkey coronavirus	Coronaviridae; Orthocoronavirinae; Gammacoronavirus; Igacovirus,
256	EU022525	Turkey	Turkey coronavirus	Turkey coronavirus	Coronaviridae; Orthocoronavirinae; Gammacoronavirus; Igacovirus,
257	EU022526	Turkey	Turkey coronavirus	Turkey coronavirus	Coronaviridae; Orthocoronavirinae; Gammacoronavirus; Igacovirus,
258	GQ427176	Turkey	Turkey coronavirus	Turkey coronavirus	Coronaviridae; Orthocoronavirinae; Gammacoronavirus; Igacovirus,
259	JQ065044	Bird White-eye	White-eye coronavirus HKU16	White-eye coronavirus	Coronaviridae; Orthocoronavirinae; Deltacoronavirus; Buldecovirus,
260	JQ065048	Duck Wigeon	Wigeon coronavirus HKU20	Wigeon coronavirus	Coronaviridae; Orthocoronavirinae; Deltacoronavirus; Andecovirus,

## Sheet: Table S2
Table S2: list of genes selected by RWR algorithm for HCoV-229E, along with proximity score.
	NodeNames	Score
1	ANPEP	0.216432
2	RAD18	0.0163272
3	APEX1	0.0163038
4	MTDH	0.016252
5	CSNK2A1	0.00124956
6	ZBTB16	0.00123121
7	TOPORS	0.00122206
8	PCNA	0.000408217
9	UBE2I	0.000380807
10	UBC	0.000214442
11	APP	0.000206422
12	EP300	0.000191183
13	UBE2A	0.000189655
14	UBE2B	0.000186363
15	DZIP3	0.000186321
16	SRPK2	0.000186068
17	TERF1	0.000183933
18	USP7	0.00018318
19	USP2	0.000182254
20	TSG101	0.000180104
21	TRIM23	0.000179982
22	HLTF	0.000179742
23	MAPK8	0.000178753
24	MAP3K1	0.00017863
25	RAD51	0.000178292
26	TRIM8	0.00017812
27	POLH	0.000177778
28	SHPRH	0.000177514
29	SIVA1	0.000177499
30	NBN	0.000177457
31	PCGF6	0.00017731
32	RFC2	0.000177246
33	TAX1BP1	0.000177148
34	POLK	0.000176976
35	MDM2	0.000176896
36	XRCC1	0.000176765
37	MLKL	0.000176572
38	HMGA1	0.000176533
39	TP53BP1	0.000176455
40	CDC7	0.000176317
41	XRCC5	0.000175646
42	POLB	0.000175516
43	UBR3	0.000175384
44	SLF1	0.000175117
45	SIRT1	0.00017482
46	TERF2IP	0.000174607
47	SRPK1	0.000173936
48	TERF2	0.00017327
49	HIF1A	0.000171978
50	GZMA	0.000171719
51	HNRNPL	0.000171512
52	POLR3D	0.00017137
53	FEN1	0.000171112
54	NUDT3	0.000170802
55	MUTYH	0.000170446
56	GZMK	0.000169672
57	HOXC13	0.000169671
58	HMGA2	0.000169545
59	TXN	0.000169475
60	TCF21	0.000169344
61	TP53	3.42021e-05
62	USP21	3.22965e-05
63	UBE2N	2.99941e-05
64	UBE2D1	2.74333e-05
65	UBE2D3	2.73816e-05
66	SUMO2	2.45257e-05
67	SUMO1	2.34918e-05
68	WRN	2.34071e-05
69	UBE2D2	2.21354e-05
70	H2AX	2.20666e-05
71	CDK1	2.01755e-05
72	UBE2D4	1.92094e-05
73	UBE2E1	1.9184e-05
74	SIN3A	1.91752e-05
75	UBE2W	1.87202e-05
76	PARP1	1.83604e-05
77	TRAIP	1.78317e-05
78	PLK1	1.77006e-05
79	TOP1	1.74661e-05
80	XRCC6	1.685e-05
81	UBE2L6	1.67739e-05
82	SERBP1	1.63011e-05
83	SATB1	1.62213e-05
84	REV1	1.59969e-05
85	HNRNPAB	1.53992e-05
86	NKX3-1	1.5339e-05
87	HABP4	1.52718e-05
88	RHOXF2	1.5043e-05
89	PSMC1	1.50271e-05
90	EPM2A	1.50028e-05
91	UBE2J1	1.48874e-05
92	HOXC9	1.45171e-05
93	NR2E3	1.44087e-05
94	GOLGA2	1.42943e-05
95	HNRNPK	1.33224e-05
96	MAGEC2	1.26792e-05
97	CDKN1A	1.23112e-05
98	PNKP	1.20316e-05
99	UBE2H	1.19976e-05
100	HUWE1	1.18997e-05
101	TRIM27	1.18625e-05
102	CDK2	1.15249e-05
103	RAD17	1.15046e-05
104	SET	1.12791e-05
105	H3-4	1.10729e-05
106	ANAPC11	1.10384e-05
107	RFC4	1.09806e-05
108	NDUFB7	1.06751e-05
109	THOC3	1.0649e-05
110	UBE2V2	1.06284e-05
111	BRCA1	1.05555e-05
112	H3C1	9.86532e-06
113	HDAC1	9.77879e-06
114	BRD4	9.61527e-06
115	AR	9.5809e-06
116	CHTF18	9.46082e-06
117	ESR1	9.35771e-06
118	ATM	9.25829e-06
119	MSH6	9.12613e-06
120	CDK9	8.99409e-06
121	HMGB2	8.86631e-06
122	NEDD4	8.82864e-06
123	CDKN2A	8.80462e-06
124	NR3C1	8.62087e-06
125	PTBP1	8.57086e-06
126	UBA1	8.43699e-06
127	MDC1	8.4217e-06
128	RPA1	8.41783e-06
129	POLL	8.38573e-06
130	MLH1	8.36607e-06
131	TRAF2	8.33094e-06
132	RELA	8.31653e-06
133	MSH2	8.26191e-06
134	PML	8.15067e-06
135	ACTG1	8.13432e-06
136	PCBP2	8.0979e-06
137	RB1	7.95572e-06
138	CREBBP	7.86165e-06
139	SP1	7.80547e-06
140	H2BC21	7.77461e-06
141	HSP90AA1	7.72658e-06
142	BMI1	7.69218e-06
143	NEIL1	7.59094e-06
144	LIG4	7.51476e-06
145	SMAD3	7.42948e-06
146	CHEK2	7.3855e-06
147	CASP3	7.38074e-06
148	AGTRAP	7.28372e-06
149	HDAC3	7.16351e-06
150	JUN	7.09431e-06
151	TCF4	7.0707e-06
152	NCOR1	7.00086e-06
153	RARA	6.98296e-06
154	HDAC2	6.97805e-06
155	CDK4	6.96178e-06
156	NPM1	6.90777e-06
157	UBR1	6.71605e-06
158	BLM	6.62002e-06
159	KRT40	6.55945e-06
160	SIAH1	6.52253e-06
161	TCF3	6.46954e-06
162	CBX5	6.4274e-06
163	PRKDC	6.41342e-06
164	RNF2	6.33342e-06
165	ITCH	6.32951e-06
166	GSK3B	6.27067e-06
167	EWSR1	6.24192e-06
168	APLP1	6.20265e-06
169	TRIM54	6.17447e-06
170	TCF12	6.17045e-06
171	CEBPA	6.16044e-06
172	RCHY1	6.15877e-06
173	HSPA4	6.15782e-06
174	CHAF1A	6.13737e-06
175	FHL2	6.12067e-06
176	LIG3	6.10617e-06
177	EIF2S2	6.08597e-06
178	STUB1	6.08326e-06
179	POLI	6.08057e-06
180	MAGEA11	6.05132e-06
181	LMO4	6.04065e-06
182	EGFR	5.98881e-06
183	PRKCA	5.96652e-06
184	RNF126	5.96297e-06
185	NCL	5.94678e-06
186	PALB2	5.92401e-06
187	EEF1G	5.8899e-06
188	EDARADD	5.88367e-06
189	FBXW7	5.86807e-06
190	XIAP	5.86517e-06
191	TRAF6	5.86129e-06
192	CRMP1	5.85598e-06
193	BIRC2	5.83954e-06
194	UBE2U	5.81275e-06
195	UBR5	5.7914e-06
196	RNF40	5.77762e-06
197	HOXB6	5.74792e-06
198	ZNF24	5.72429e-06
199	RNF20	5.71378e-06
200	KLF15	5.70952e-06

## Sheet: Table S3
Table S3: list of genes selected by RWR algorithm for SARS-CoV, along with proximity score.
	NodeNames	Score
1	CD209	0.0417824
2	CLEC4M	0.0390221
3	SFTPD	0.0369779
4	CLEC4G	0.0363914
5	EIF3F	0.0360831
6	ACE2	0.0360375
7	AGT	0.00546807
8	VAC14	0.00320342
9	CLU	0.00316195
10	DMBT1	0.00226988
11	DCN	0.00223997
12	MASP1	0.00222791
13	UPK1A	0.00221867
14	APP	0.000826247
15	EIF3H	0.000671503
16	EIF3M	0.000657433
17	SMAD9	0.000656837
18	ATXN1	0.000654866
19	PTN	0.000654788
20	HAX1	0.000650478
21	MTOR	0.000649403
22	EEF1A1	0.000649191
23	RPS6KB1	0.000646392
24	DKC1	0.000646355
25	MSH4	0.000644355
26	HNRNPK	0.000642382
27	CDK11A	0.000641116
28	CDK11B	0.000639186
29	FBXO32	0.000638049
30	GEM	0.00054169
31	SHBG	0.000534651
32	APOA1	0.000529542
33	APOH	0.000526543
34	WBP2	0.000526426
35	CAPN1	0.000526386
36	FTL	0.000526252
37	RPSA	0.000525916
38	EIF6	0.00052533
39	NUP214	0.000523807
40	ARSA	0.000523784
41	MAP3K11	0.000523155
42	PRDX1	0.000522855
43	ASGR1	0.000521905
44	CPN1	0.000521371
45	EIF3I	0.000521357
46	IFI35	0.000521115
47	MT-CO1	0.000520929
48	PKLR	0.000520109
49	AZU1	0.000519877
50	SFTPA1	0.000341356
51	GRB2	0.000204623
52	TP53	0.000177333
53	ATP6AP2	0.000165211
54	REN	0.000158227
55	ITSN2	0.00015594
56	EWSR1	0.00015409
57	ACE	0.000152878
58	GSDMB	0.000151095
59	ECE1	0.000150162
60	MME	0.000149592
61	CDC42	9.91254e-05
62	GADD45A	8.52822e-05
63	MAPK6	8.17982e-05
64	CSNK2A1	8.14569e-05
65	PCNA	8.10041e-05
66	LIG4	8.07203e-05
67	NCK2	7.59622e-05
68	MLH1	6.50886e-05
69	GSK3B	6.39016e-05
70	TRIP13	6.09567e-05
71	MAPK8IP2	6.07253e-05
72	NUDT21	5.60697e-05
73	PAXIP1	5.59845e-05
74	H2AX	5.43512e-05
75	SRPK2	5.415e-05
76	C3	5.39791e-05
77	ELN	5.35679e-05
78	EIF3G	5.2712e-05
79	SERPING1	5.25097e-05
80	PRDX6	5.2461e-05
81	FCN2	5.24588e-05
82	RPS6KA6	5.24309e-05
83	RPS6KA3	5.23714e-05
84	UFD1	5.21727e-05
85	PIN1	4.79813e-05
86	HSPB1	4.63094e-05
87	VKORC1	4.62159e-05
88	EGFR	4.57276e-05
89	DISC1	4.37226e-05
90	CETN2	3.97045e-05
91	PPIC	3.94676e-05
92	UBC	3.82081e-05
93	BRCA1	3.79382e-05
94	SRPK1	3.78786e-05
95	FLNA	3.62475e-05
96	BMP1	3.61289e-05
97	GPS2	3.59618e-05
98	LRP2	3.58042e-05
99	TGFB1	3.57217e-05
100	EXOSC10	3.55887e-05
101	FN1	3.52796e-05
102	SNCA	3.43212e-05
103	RBBP6	3.41824e-05
104	INSR	3.40003e-05
105	MET	3.35963e-05
106	AHSG	3.29609e-05
107	IGF2	3.28857e-05
108	VBP1	3.28524e-05
109	EXOSC6	3.28261e-05
110	FGF2	3.28017e-05
111	C1QA	3.27911e-05
112	MSH5	3.26632e-05
113	INS	3.26154e-05
114	TGFB2	3.25436e-05
115	TNF	3.25304e-05
116	MLH3	3.25001e-05
117	PLA2G2A	3.24868e-05
118	FAM20B	3.23292e-05
119	COL6A1	3.22575e-05
120	KDM1A	3.22559e-05
121	COL14A1	3.21241e-05
122	MAPK1	3.20364e-05
123	VHL	3.08244e-05
124	UBE2D3	3.08151e-05
125	AKT1	3.06314e-05
126	YWHAQ	3.06035e-05
127	MDM2	3.00842e-05
128	PRDX4	2.98722e-05
129	SERPINB5	2.95582e-05
130	BAG6	2.91659e-05
131	SKP1	2.878e-05
132	ESR1	2.87663e-05
133	CDC34	2.83047e-05
134	MYOD1	2.81192e-05
135	NMI	2.79298e-05
136	HSPB2	2.77041e-05
137	MEOX2	2.69777e-05
138	HIVEP1	2.67392e-05
139	PAK1	2.66849e-05
140	PDIA3	2.65234e-05
141	PLEKHO1	2.64711e-05
142	BATF	2.644e-05
143	SKIV2L	2.494e-05
144	LAMTOR5	2.47478e-05
145	PPP2CA	2.437e-05
146	XRCC6	2.42654e-05
147	B4GALT1	2.42428e-05
148	RHOXF2	2.42407e-05
149	CCNL1	2.42146e-05
150	TGFBR1	2.41882e-05
151	RBFOX2	2.3693e-05
152	CYP2E1	2.36176e-05
153	ABI2	2.31327e-05
154	RBBP8	2.31242e-05
155	SPTBN1	2.31146e-05
156	CRK	2.30333e-05
157	TTR	2.29704e-05
158	SORBS3	2.29266e-05
159	SMAD3	2.27306e-05
160	MAPK9	2.24011e-05
161	FOS	2.20686e-05
162	MDC1	2.1997e-05
163	PRNP	2.19352e-05
164	TSC22D4	2.18589e-05
165	KLF11	2.17938e-05
166	CCDC85B	2.17732e-05
167	PDE4DIP	2.17024e-05
168	WDYHV1	2.16699e-05
169	TNIK	2.16684e-05
170	TP53BP1	2.16318e-05
171	KEAP1	2.15805e-05
172	HSPD1	2.15638e-05
173	MVP	2.15467e-05
174	SSR1	2.15187e-05
175	TGFBR2	2.1494e-05
176	PRR20A	2.14676e-05
177	TCEANC	2.14362e-05
178	ACTN1	2.14086e-05
179	POLR1C	2.13723e-05
180	COMMD1	2.13664e-05
181	SMAD4	2.12845e-05
182	BHLHE40	2.12536e-05
183	RPL23	2.12221e-05
184	CBY1	2.1144e-05
185	ABI3	2.11059e-05
186	SYVN1	2.1099e-05
187	MGAT5B	2.1096e-05
188	ZWINT	2.10838e-05
189	SMAD2	2.10771e-05
190	C7	2.106e-05
191	IL24	2.10302e-05
192	KNSTRN	2.10292e-05
193	EEF1G	2.10256e-05
194	C9	2.10024e-05
195	KATNA1	2.09164e-05
196	CLUAP1	2.09096e-05
197	C8B	2.09065e-05
198	EPPIN	2.08609e-05
199	LYZ	2.08609e-05
200	ADCYAP1R1	2.08122e-05

## Sheet: Table S4
Table S4: list of genes selected by RWR algorithm for MERS-CoV, along with proximity score.
	NodeNames	Score
1	DPP4	0.213997
2	CXCL11	0.00391992
3	CCL11	0.00389562
4	CXCL9	0.0038721
5	CXCL10	0.00382025
6	CXCL2	0.00377551
7	GHRH	0.00373623
8	ADCYAP1	0.00370585
9	TAC1	0.00369824
10	GIP	0.00366765
11	GCG	0.00366657
12	NPY	0.00366344
13	PYY	0.00365197
14	NPPB	0.00364999
15	VIP	0.00363558
16	CCL22	0.00363346
17	TUBGCP2	0.00359386
18	DKK1	0.00357383
19	FAP	0.00191751
20	GIPR	0.000412587
21	UBC	0.000376366
22	GHRHR	0.000373623
23	MEP1B	0.000371075
24	PF4	0.000366733
25	KIF14	0.000360699
26	XCL1	0.00034709
27	CXCL14	0.000343529
28	PF4V1	0.000335688
29	SGTA	0.000329867
30	MEP1A	0.000326332
31	CCL21	0.000303058
32	CCL28	0.000301248
33	GLP1R	0.000287147
34	BAG6	0.000283648
35	CCL26	0.000281279
36	CCL13	0.000274983
37	CCL8	0.000274331
38	SCTR	0.00026035
39	KRTAP10-3	0.000240577
40	NOTCH2NLA	0.000239295
41	NOTCH2NL	0.000239202
42	CPAMD8	0.000235369
43	ADCYAP1R1	0.000222581
44	MDFI	0.000221207
45	LRP6	0.000219914
46	SMAD9	0.000219224
47	KRTAP10-1	0.000218484
48	CXCL6	0.000217147
49	PPBP	0.000209405
50	UBQLN4	0.00019489
51	CCL14	0.000193481
52	MEOX2	0.000187955
53	CXCR3	0.000175607
54	CXCL17	0.000170667
55	CXCL5	0.000151428
56	UBQLN1	0.000146139
57	TACR2	0.000143536
58	TACR1	0.000143421
59	ADAMTSL4	0.000141652
60	XRCC6	0.000141056
61	NR1H2	0.000139915
62	CENPB	0.000139098
63	TACR3	0.000138684
64	CRYAB	0.000138524
65	VCAM1	0.000138433
66	CCR4	0.000137942
67	ATP12A	0.000137869
68	GCLC	0.000137825
69	NPY1R	0.00013772
70	HERC3	0.000136887
71	XCL2	0.000124906
72	DPP8	0.0001148
73	KRTAP10-9	9.35351e-05
74	PSMA3	9.23225e-05
75	KRT40	8.94028e-05
76	PIK3R1	8.835e-05
77	NPR1	8.73559e-05
78	NPR2	8.725e-05
79	NPR3	8.725e-05
80	EWSR1	8.6424e-05
81	HDAC4	8.59573e-05
82	EPS8	7.71322e-05
83	CXCL3	7.01094e-05
84	CCL25	6.91941e-05
85	CXCL1	6.7775e-05
86	CCL20	6.75035e-05
87	CCL24	6.71801e-05
88	LRRK2	6.28043e-05
89	SYNE4	5.96768e-05
90	TNFAIP6	5.87088e-05
91	CCDC155	5.84043e-05
92	PLAUR	5.80481e-05
93	CCR3	5.69136e-05
94	NUDT3	5.64019e-05
95	SFTPC	5.60164e-05
96	PTPN5	5.59271e-05
97	CCL18	5.57166e-05
98	BMF	5.57014e-05
99	PAX8	5.56135e-05
100	MTUS2	5.39531e-05
101	CCL1	5.11294e-05
102	MMP9	5.01228e-05
103	LNX1	4.36653e-05
104	FN1	3.96155e-05
105	CCL17	3.76638e-05
106	CLU	3.51624e-05
107	APP	3.2364e-05
108	TAC4	2.86958e-05
109	CLK1	2.84169e-05
110	GAST	2.79232e-05
111	SVIL	2.75431e-05
112	TUBG1	2.72467e-05
113	CCL5	2.56856e-05
114	CXCL13	2.51922e-05
115	NPPA	2.47714e-05
116	NPPC	2.40017e-05
117	ACKR2	2.36426e-05
118	GCLM	2.09362e-05
119	ATP13A2	2.02869e-05
120	VCAN	1.97157e-05
121	PPIB	1.56016e-05
122	TAC3	1.46116e-05
123	GRK5	1.44415e-05
124	DNAL4	1.40221e-05
125	GNAI3	1.40026e-05
126	SNTA1	1.39793e-05
127	LSM7	1.39776e-05
128	CCL3	1.39072e-05
129	CXCL8	1.35459e-05
130	CYFIP1	1.32045e-05
131	SCT	1.31661e-05
132	AKT2	1.215e-05
133	KNG1	1.17916e-05
134	PTH	1.07411e-05
135	GSK3B	1.07074e-05
136	NTS	1.01238e-05
137	LAMA5	1.00862e-05
138	LAMA1	1.00825e-05
139	GNRH1	9.78997e-06
140	CCL4L2	9.70721e-06
141	TK1	8.92528e-06
142	ACKR4	8.80543e-06
143	REL	7.61678e-06
144	EZR	7.60807e-06
145	USP2	7.51107e-06
146	MSN	7.28487e-06
147	PIN1	7.15557e-06
148	UBE2D1	7.0751e-06
149	ITGAD	6.99842e-06
150	KRTAP10-8	6.89582e-06
151	KRTAP10-7	6.87873e-06
152	PRKG1	6.7105e-06
153	SRPK2	6.53508e-06
154	FZD8	6.50727e-06
155	TRIM23	6.25964e-06
156	ANXA7	6.16085e-06
157	WNT1	5.98591e-06
158	APOB	5.80477e-06
159	TEX11	5.76772e-06
160	CCL7	5.7373e-06
161	AXIN1	5.63523e-06
162	CDKN1A	5.62524e-06
163	SOST	5.5873e-06
164	WNT3A	5.58574e-06
165	SERPINF1	5.55193e-06
166	CXCL12	5.55018e-06
167	UBQLN2	5.53018e-06
168	DKK2	5.49786e-06
169	STUB1	5.46039e-06
170	EEF1A1	5.14316e-06
171	CSNK2B	5.13508e-06
172	ESR1	5.08571e-06
173	DDI1	5.02219e-06
174	NME2	4.94555e-06
175	KRTAP5-9	4.86764e-06
176	UBE2L3	4.86194e-06
177	CCL2	4.80527e-06
178	CD33	4.68099e-06
179	LDLR	4.47848e-06
180	EP300	4.47412e-06
181	MAPK6	4.33412e-06
182	TF	4.31691e-06
183	THBD	4.31081e-06
184	KRTAP4-12	4.30034e-06
185	PROC	4.29253e-06
186	NR3C1	4.24056e-06
187	SMN2	4.18668e-06
188	LRRK1	4.18288e-06
189	KRTAP10-5	4.16725e-06
190	SPRY2	4.10653e-06
191	TP53	4.09534e-06
192	CCL23	4.06628e-06
193	SRGN	4.03551e-06
194	GADD45A	4.0248e-06
195	GOT2	3.9906e-06
196	KRTAP4-2	3.98259e-06
197	NR4A1	3.98242e-06
198	HOXA1	3.63797e-06
199	ERG28	3.63143e-06
200	CCL3L1	3.59184e-06
